# Supplementary material for: A Greener, Efficient Approach to Michael Addition of Barbituric Acid to Nitroalkene in Aqueous Diethylamine Medium
Source: PubMed Central journal article supplement (PMC6271361; doi:10.3390/molecules19011150), 2014-01-17

## Supplementary Materials

**Figure S1.** The crystal packing of compound **3a**. Dashed line indicates the intermolecular interactions. The hydrogens do not involved in inter molecular interactions are omitted for clarity.

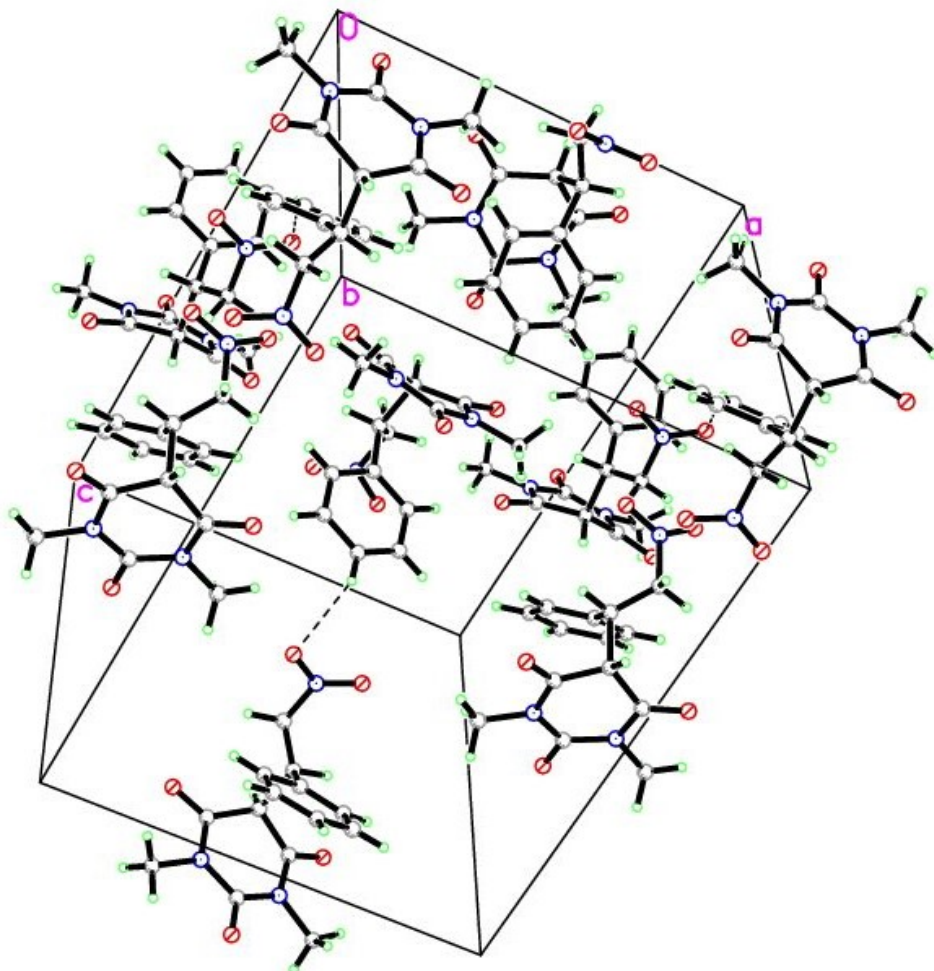

Figure S1. Cont.

| Crystal Data of <b>3a</b> (CCDC—933479)          |                                                                                                                  |
|--------------------------------------------------|------------------------------------------------------------------------------------------------------------------|
| Empirical formula                                | C <sub>14</sub> H <sub>20</sub> N <sub>3</sub> O <sub>5</sub>                                                    |
| Formula weight                                   | 305.29                                                                                                           |
| Temperature                                      | 293(2) K                                                                                                         |
| Wavelength (Cu K $\alpha$ radiation, $\lambda$ ) | 1.54178 Å                                                                                                        |
| Crystal system                                   | Orthorhombic                                                                                                     |
| Space group                                      | <i>P</i> 2 <sub>1</sub> 2 <sub>1</sub> 2 <sub>1</sub>                                                            |
| Unit cell dimensions                             | a = 12.5332 (2) Å $\alpha$ = 90.00°<br>b = 14.3843 (2) Å $\beta$ = 90.00°<br>c = 16.2357 (3) Å $\gamma$ = 90.00° |
| Volume                                           | 2926.99 (8) Å <sup>3</sup>                                                                                       |
| Z                                                | 4                                                                                                                |
| Density (calculated)                             | 1.386 kg/m <sup>3</sup>                                                                                          |
| Absorption coefficient                           | 0.90 mm <sup>-1</sup>                                                                                            |
| <i>F</i> (000)                                   | 1280                                                                                                             |
| Crystal size                                     | 0.48 × 0.37 × 0.25 mm                                                                                            |
| Theta range for data collection                  | 4.1 to 69.8°.                                                                                                    |
| Index ranges                                     | -14 ≤ h ≤ 15, -17 ≤ k ≤ 17, -19 ≤ l ≤ 12                                                                         |
| Reflections collected/ unique                    | 14208/ 3541 [R(int) = 0.0358]                                                                                    |
| Completeness to theta = 69.8°                    | 99.5%                                                                                                            |
| Absorption correction                            | multi-scan                                                                                                       |
| Refinement                                       | method Full-matrix least-squares on <i>F</i> <sup>2</sup>                                                        |
| Goodness-of-fit on <i>F</i> <sup>2</sup>         | 1.06                                                                                                             |
| Final R indices [I > 2sigma(I)]                  | R1 = 0.0784, wR2 = 0.2214                                                                                        |
| R indices (all data)                             | R1 = 0.0819, wR2 = 0.2176                                                                                        |
| Largest diff. peak and hole                      | 0.73 and -0.43 e Å <sup>-3</sup>                                                                                 |

Hydrogen-bond geometry (Å, °) of **3a**

| <i>D</i> —H $\cdots$ <i>A</i> | <i>D</i> —H | H $\cdots$ <i>A</i> | <i>D</i> $\cdots$ <i>A</i> | <i>D</i> —H $\cdots$ <i>A</i> |
|-------------------------------|-------------|---------------------|----------------------------|-------------------------------|
| C2A—H1 $\cdots$ O1A           | 0.9700      | 2.3000              | 2.733 (7)                  | 106.00                        |
| C2A—H3 $\cdots$ O3Bi          | 0.9600      | 2.6000              | 3.510 (7)                  | 159.00                        |
| C4A—H4 $\cdots$ O2A           | 0.9600      | 2.2600              | 2.706 (6)                  | 108.00                        |
| C7A—H8 $\cdots$ O1A           | 0.9800      | 2.5900              | 3.036 (8)                  | 108.00                        |
| C2B—H10 $\cdots$ O1B          | 0.9700      | 2.2800              | 2.723 (7)                  | 106.00                        |
| C11A—H11A $\cdots$ O5Aii      | 0.9300      | 2.5000              | 3.321 (7)                  | 147.00                        |
| C4B—H13 $\cdots$ O3B          | 0.9600      | 2.3000              | 2.730 (7)                  | 106.00                        |

Symmetry codes: (i)  $-x, y + 1/2, -z + 1/2$ ; (ii)  $-x + 1, y + 1/2, -z - 1/2$ .

Figure S2.  $^1\text{H-NMR}$  ( $\text{CDCl}_3$ ) of **3a**.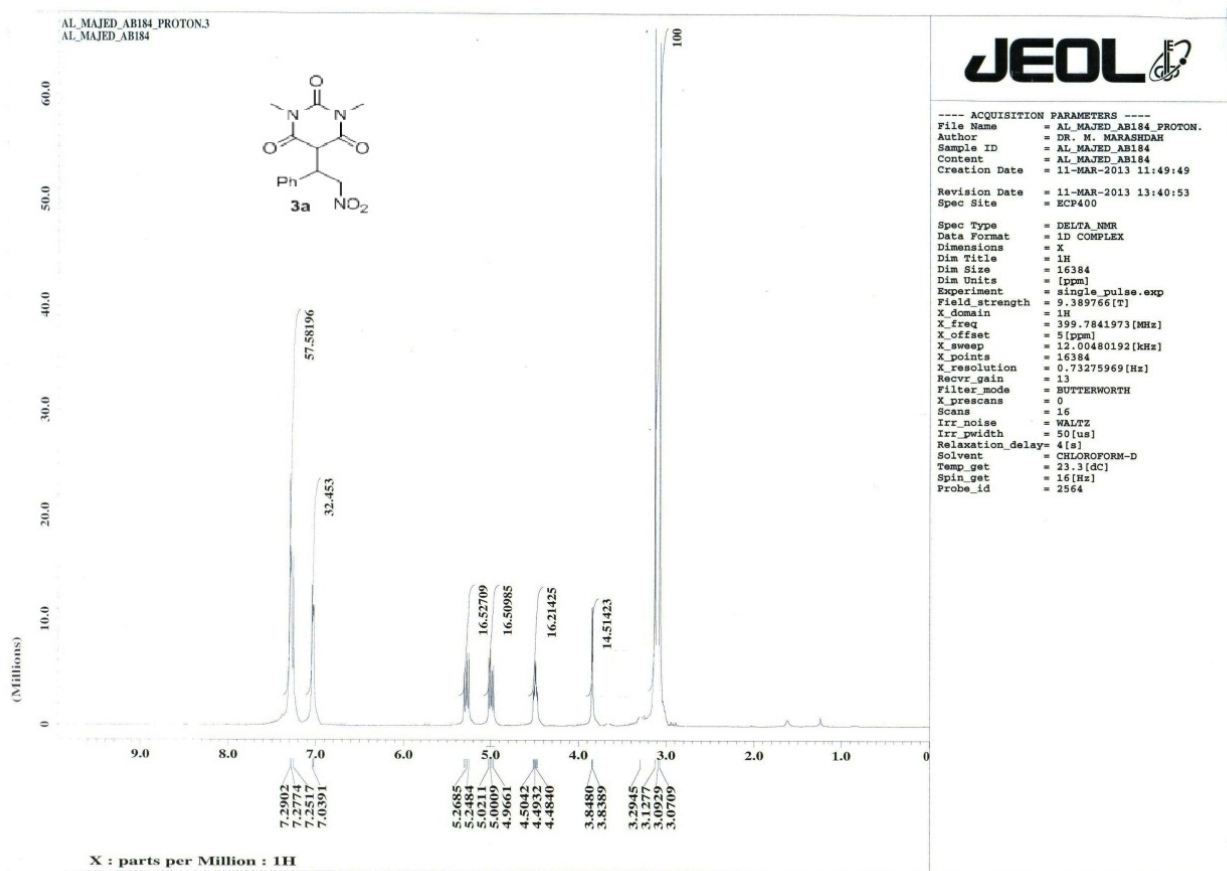

Figure S3.  $^{13}\text{C}$ -NMR ( $\text{CDCl}_3$ ) of 3a.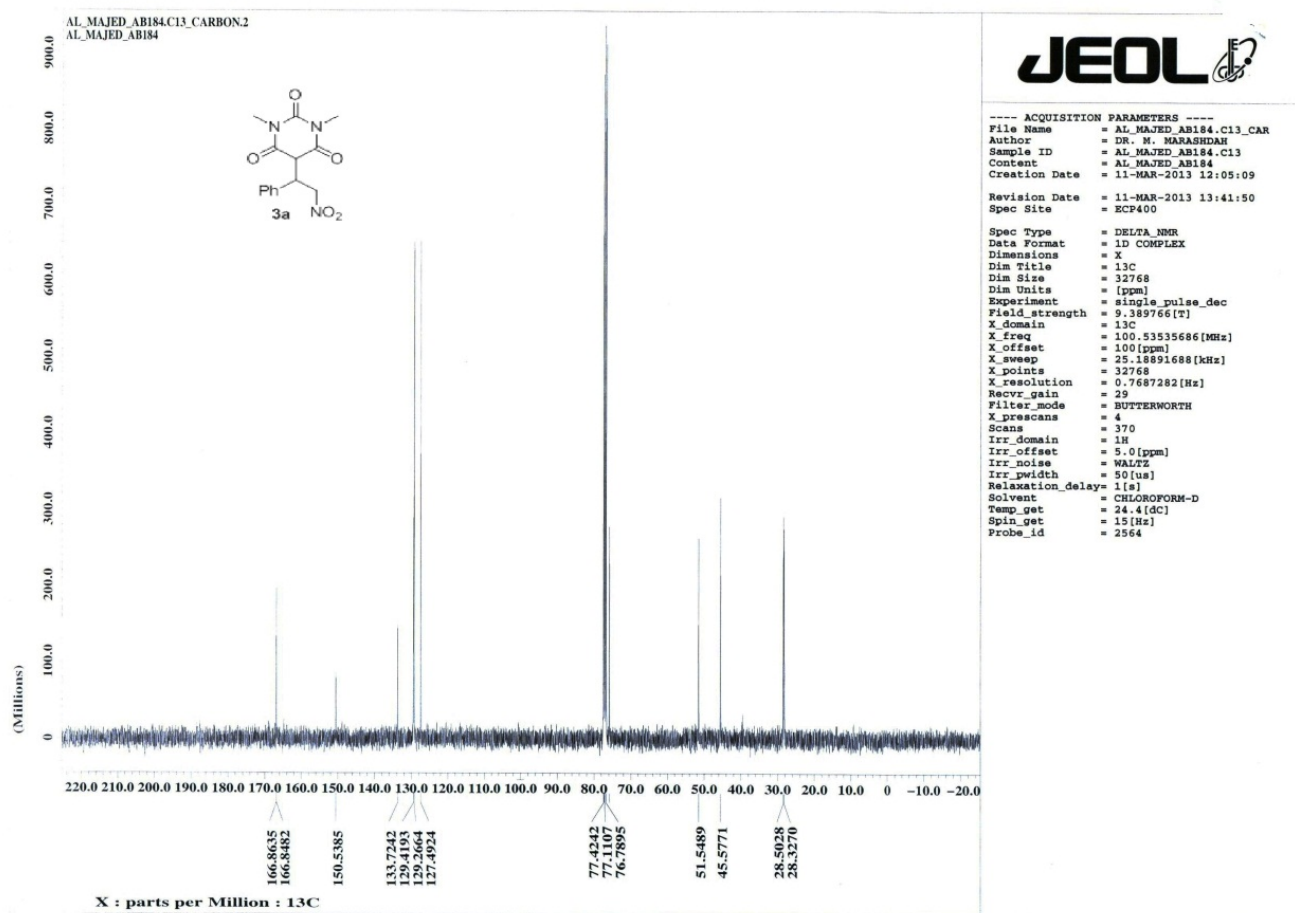

Figure S4. <sup>1</sup>H-NMR (CDCl<sub>3</sub>) of 3b.

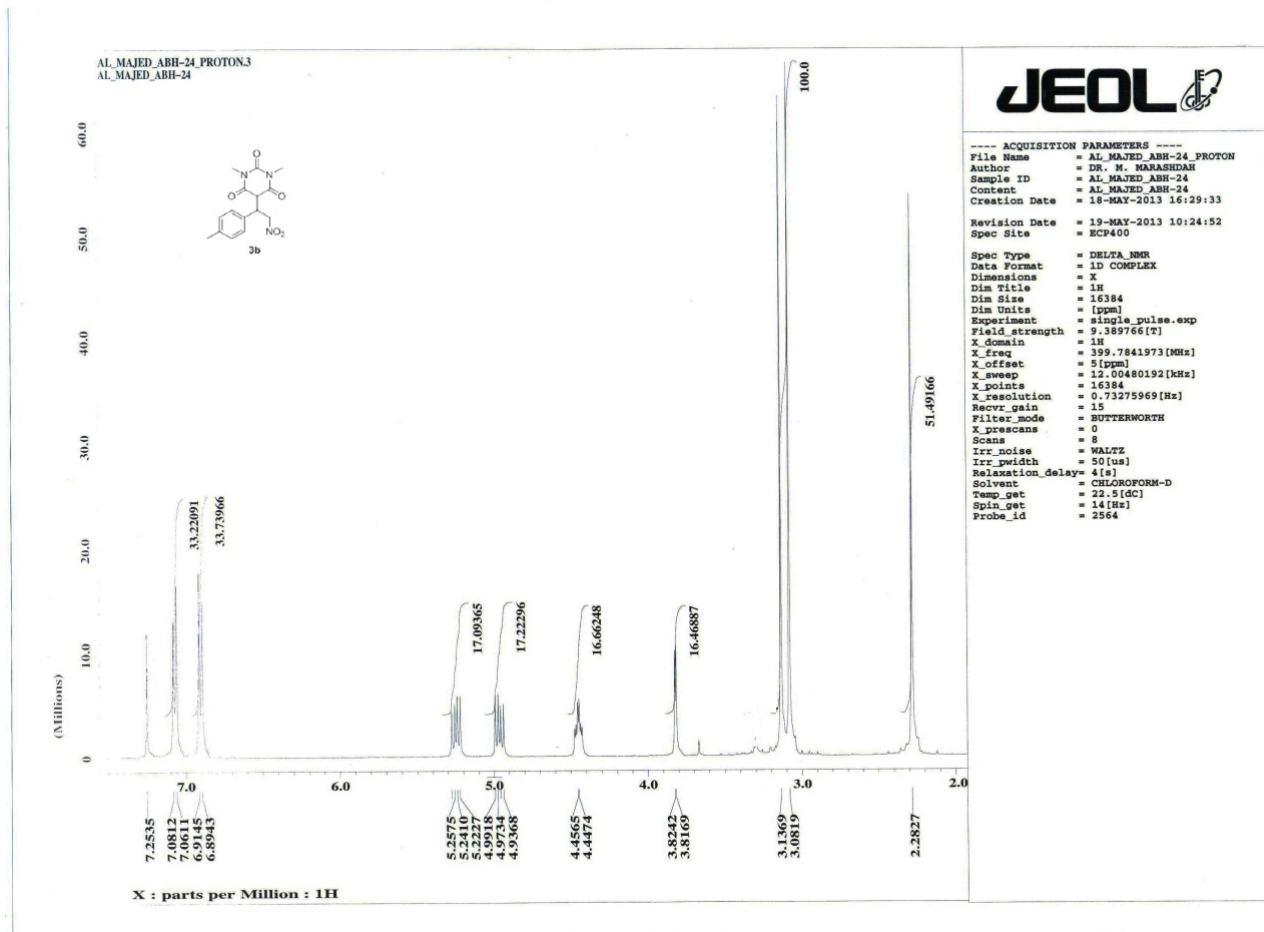

Figure S5.  $^{13}\text{C}$ -NMR ( $\text{CDCl}_3$ ) of **3b**.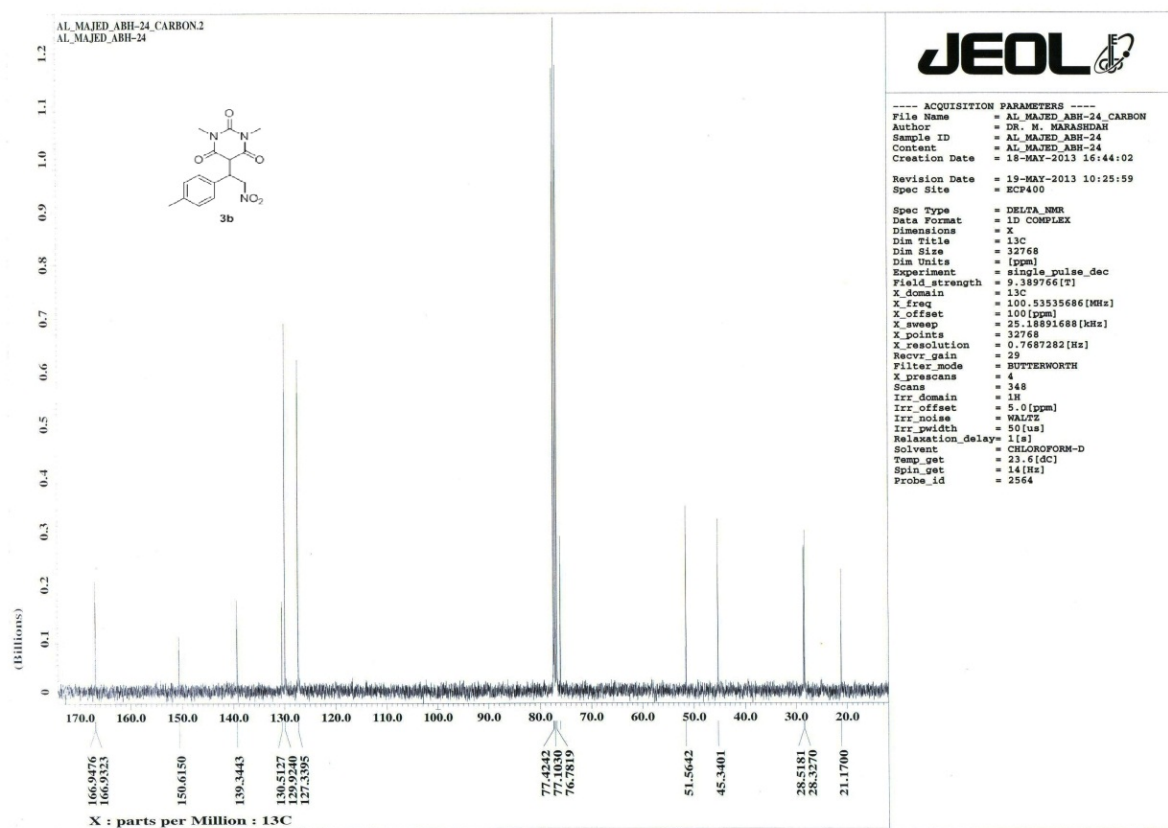

Figure S6.  $^1\text{H-NMR}$  ( $\text{DMSO-}d_6$ ) of 3c.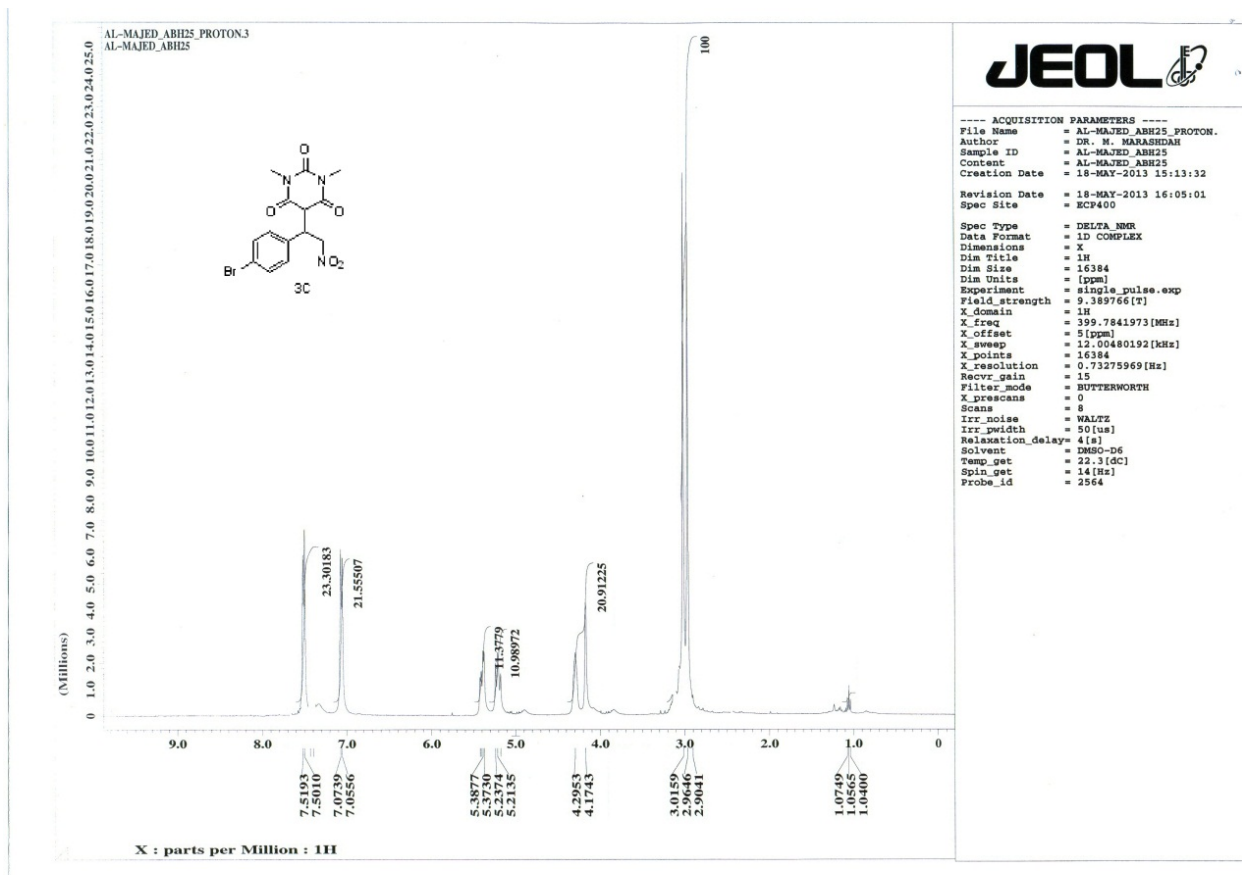

Figure S7.  $^{13}\text{C}$ -NMR (DMSO- $d_6$ ) of 3c.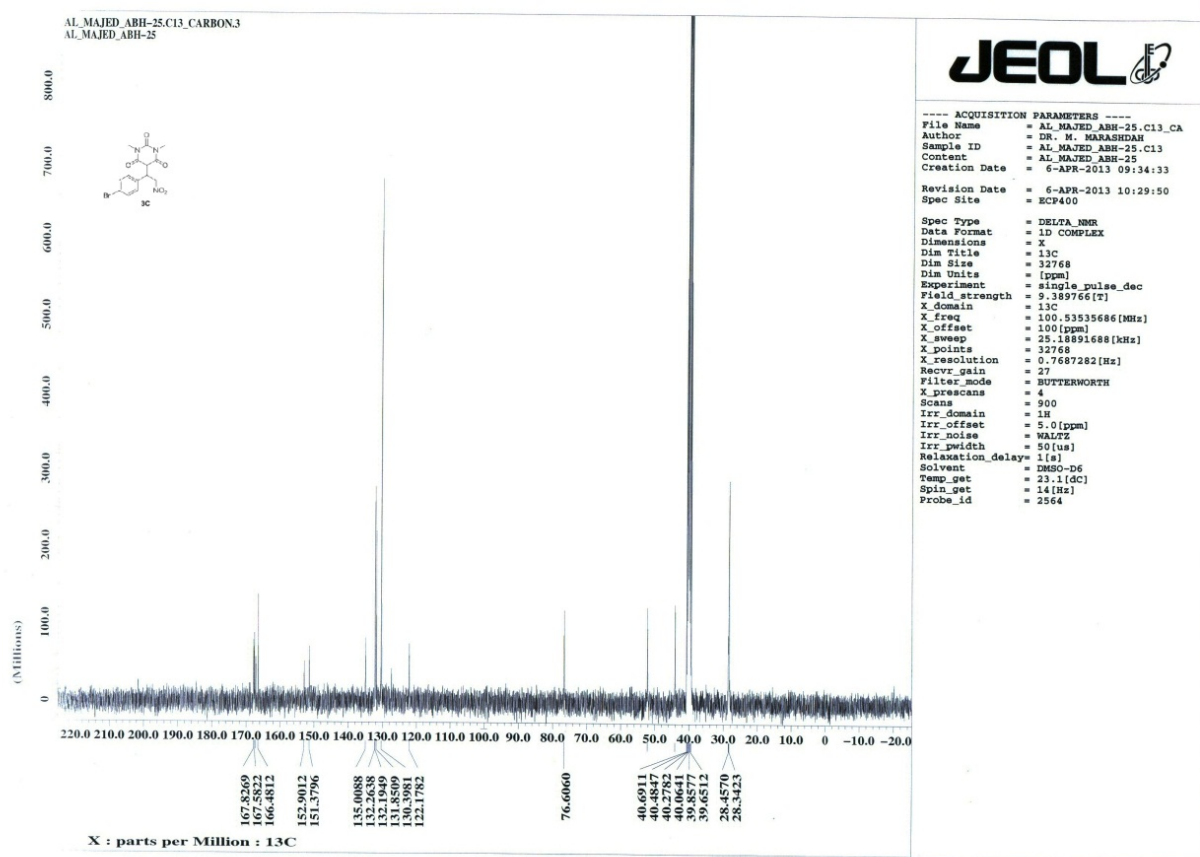



Figure S8.  $^1\text{H-NMR}$  ( $\text{DMSO-}d_6$ ) of 3d.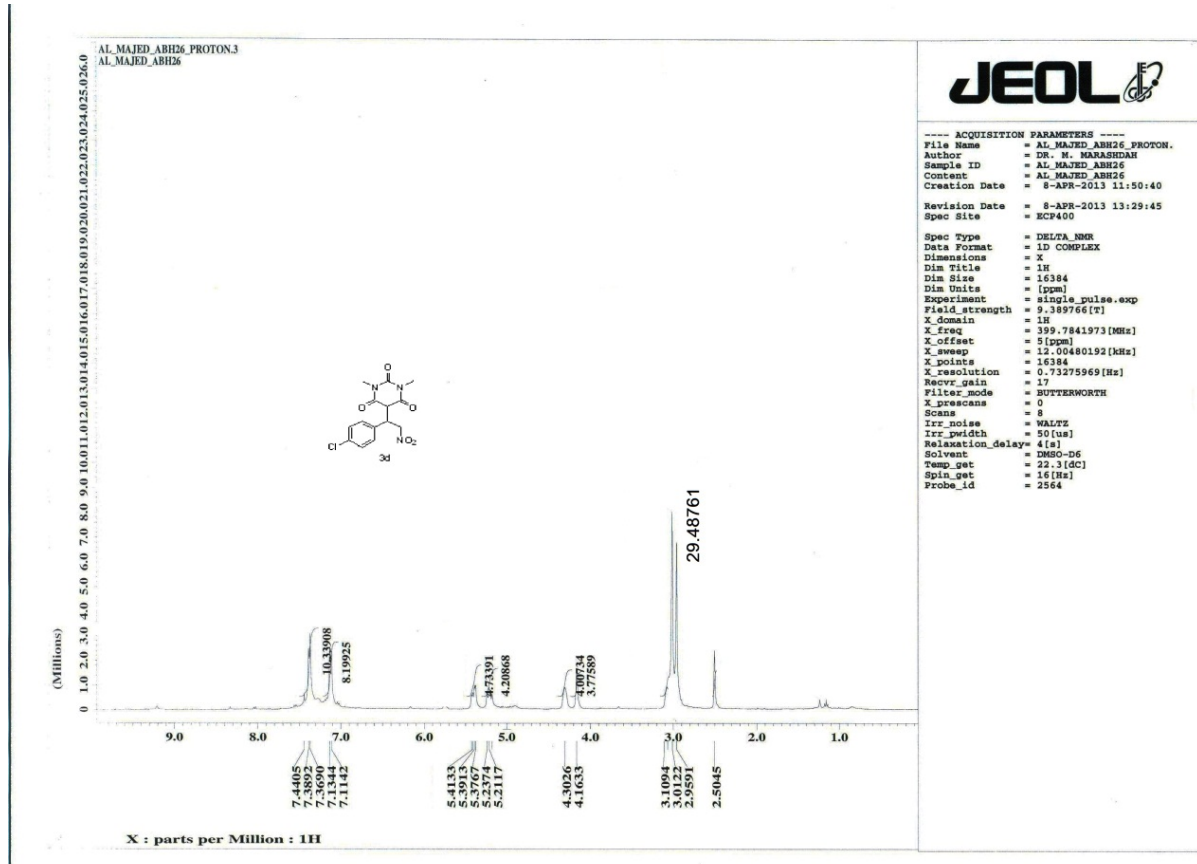

Figure S9.  $^{13}\text{C}$ -NMR (DMSO- $d_6$ ) of 3d.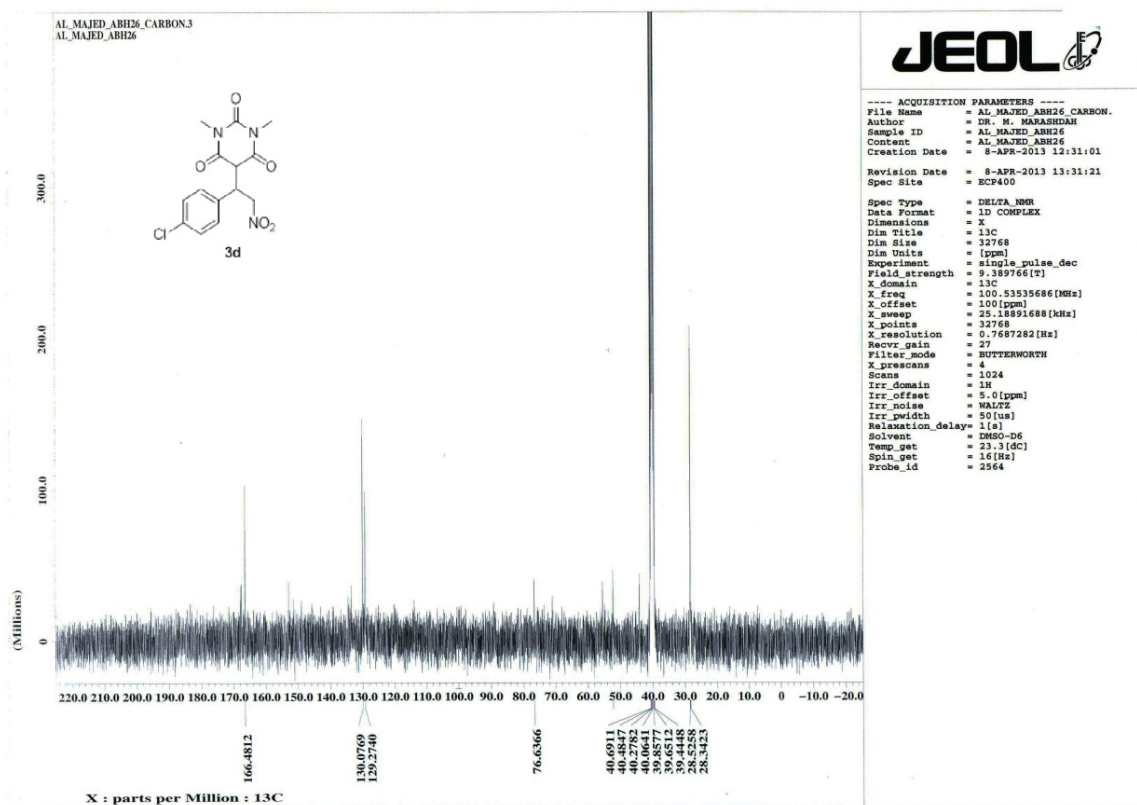

Figure S10.  $^1\text{H-NMR}$  (DMSO- $d_6$ ) of 3e.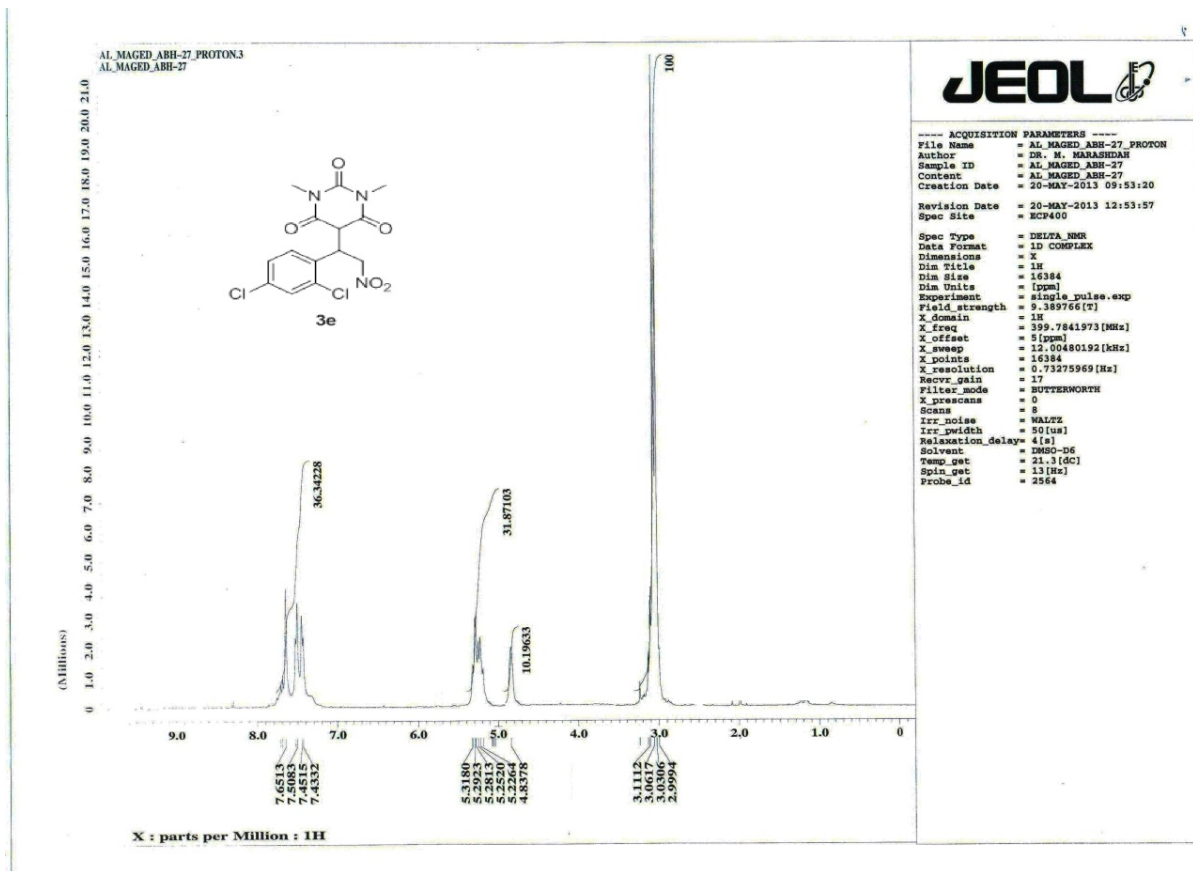

Figure S11.  $^{13}\text{C}$ -NMR (DMSO- $d_6$ ) of 3e.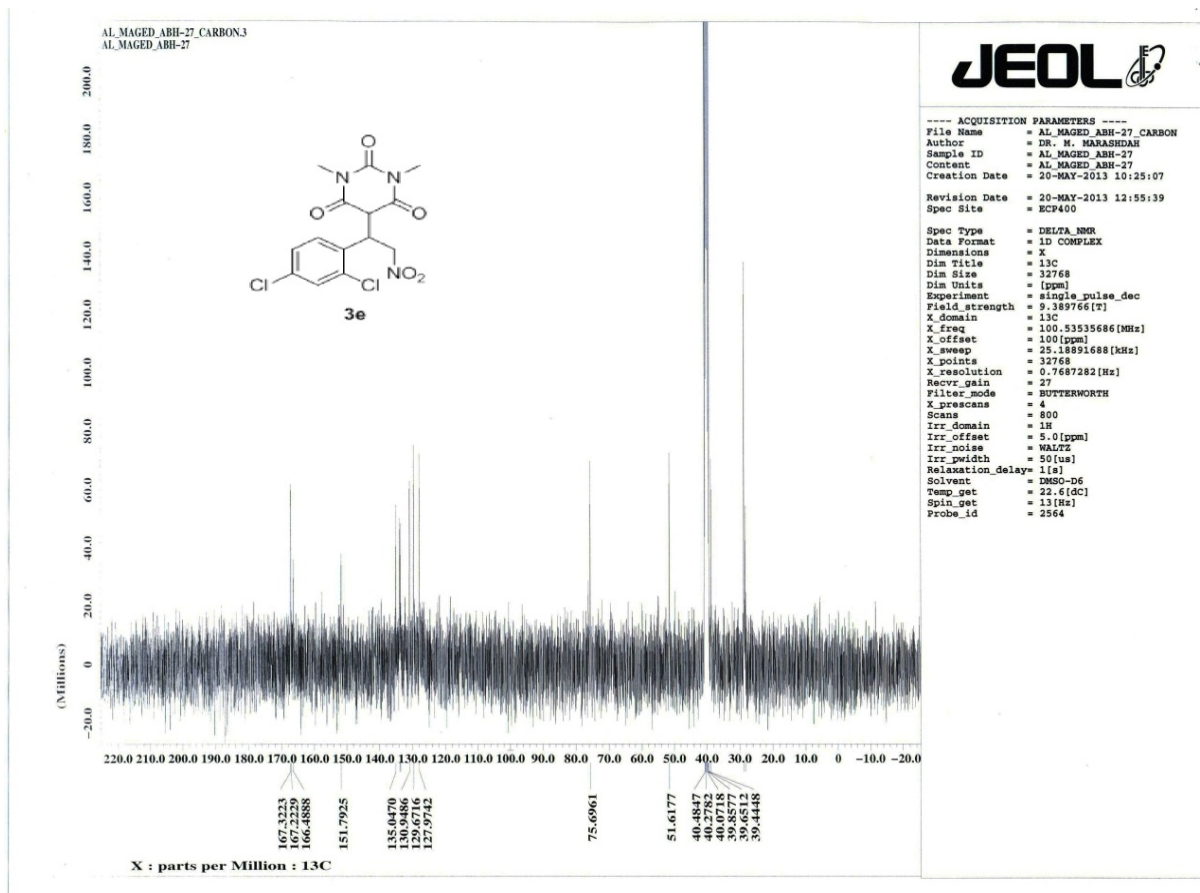

Figure S12.  $^1\text{H-NMR}$  ( $\text{DMSO-}d_6$ ) of **3g**.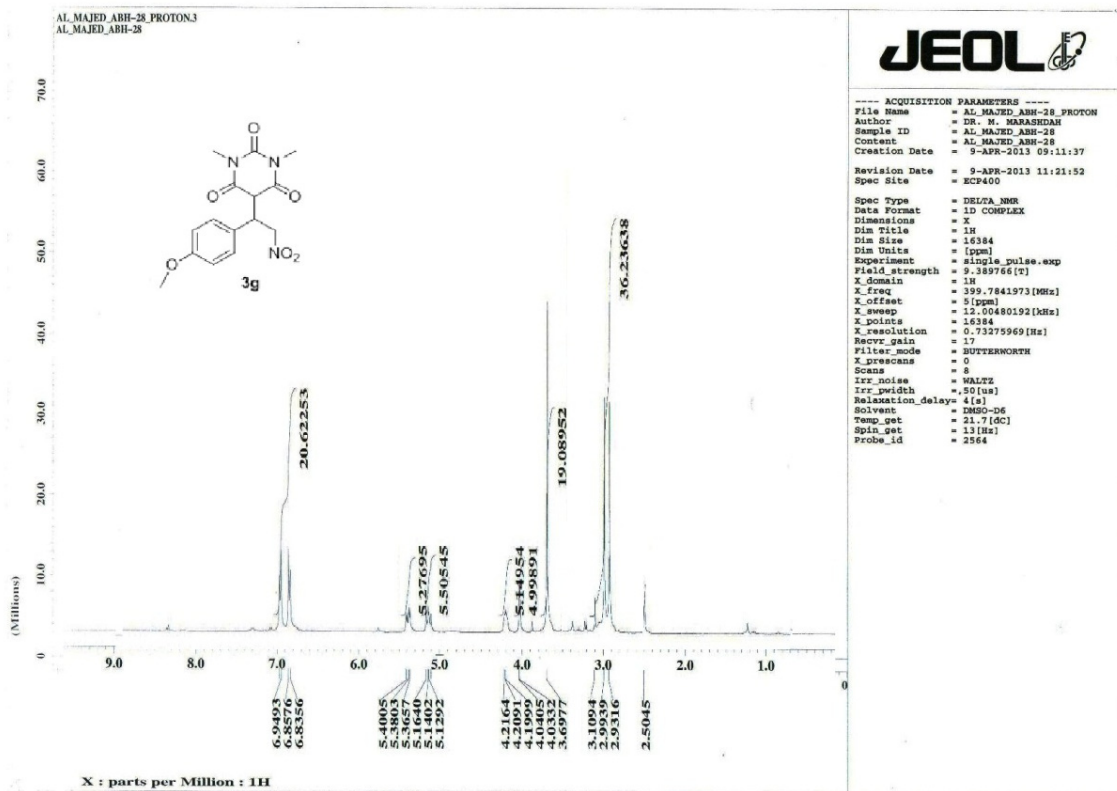

Figure S13.  $^{13}\text{C}$ -NMR (DMSO- $d_6$ ) of 3g.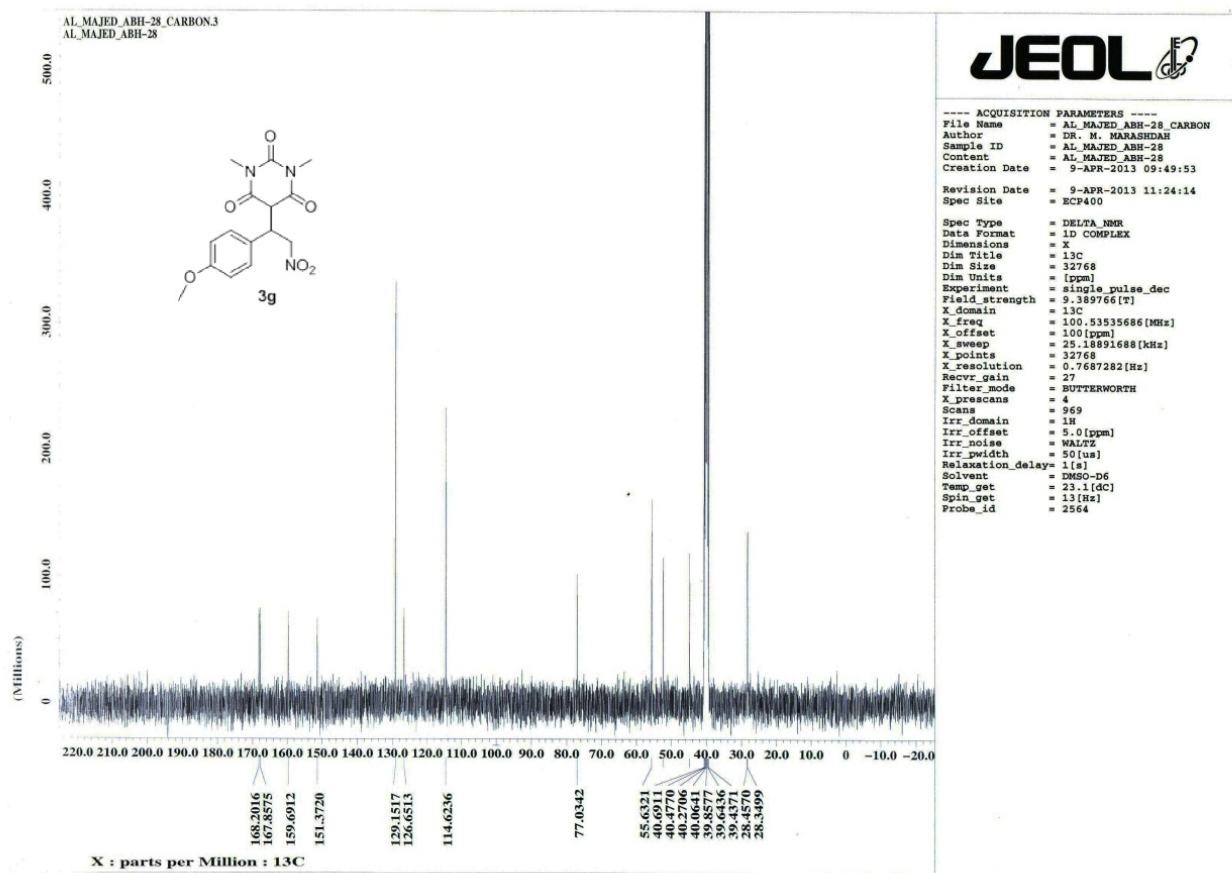

Figure S14. <sup>1</sup>H-NMR (DMSO-*d*<sub>6</sub>) of 3h.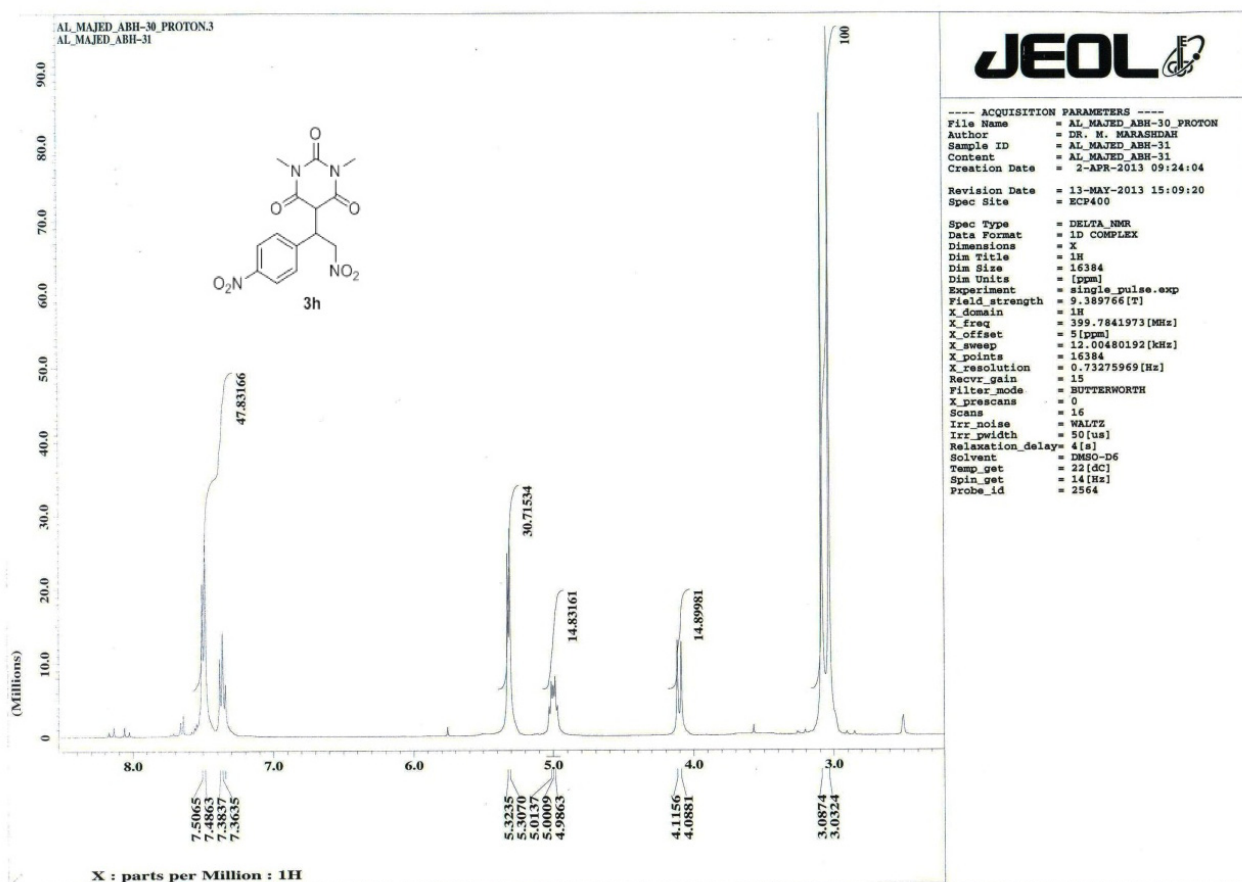

Figure S15.  $^{13}\text{C}$ -NMR (DMSO- $d_6$ ) of 3h.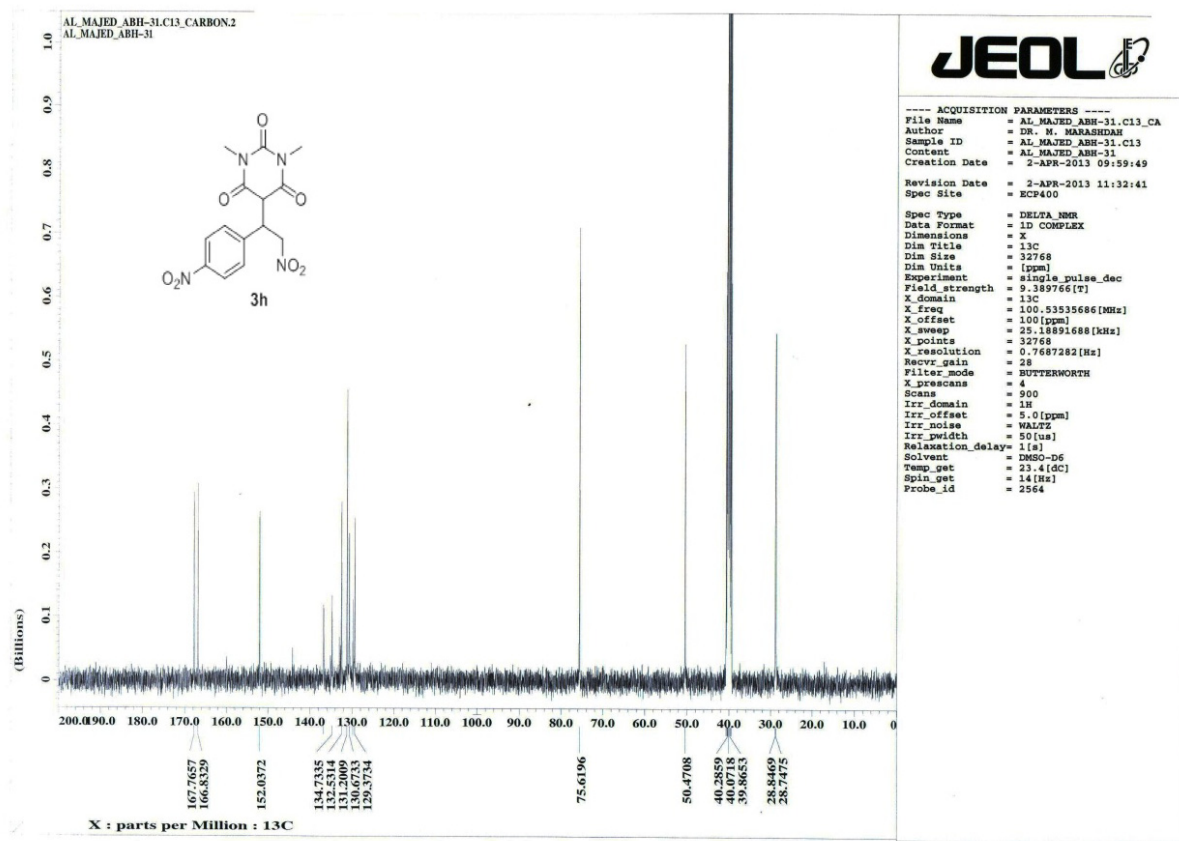



Figure S16.  $^1\text{H-NMR}$  (DMSO- $d_6$ ) of 3i.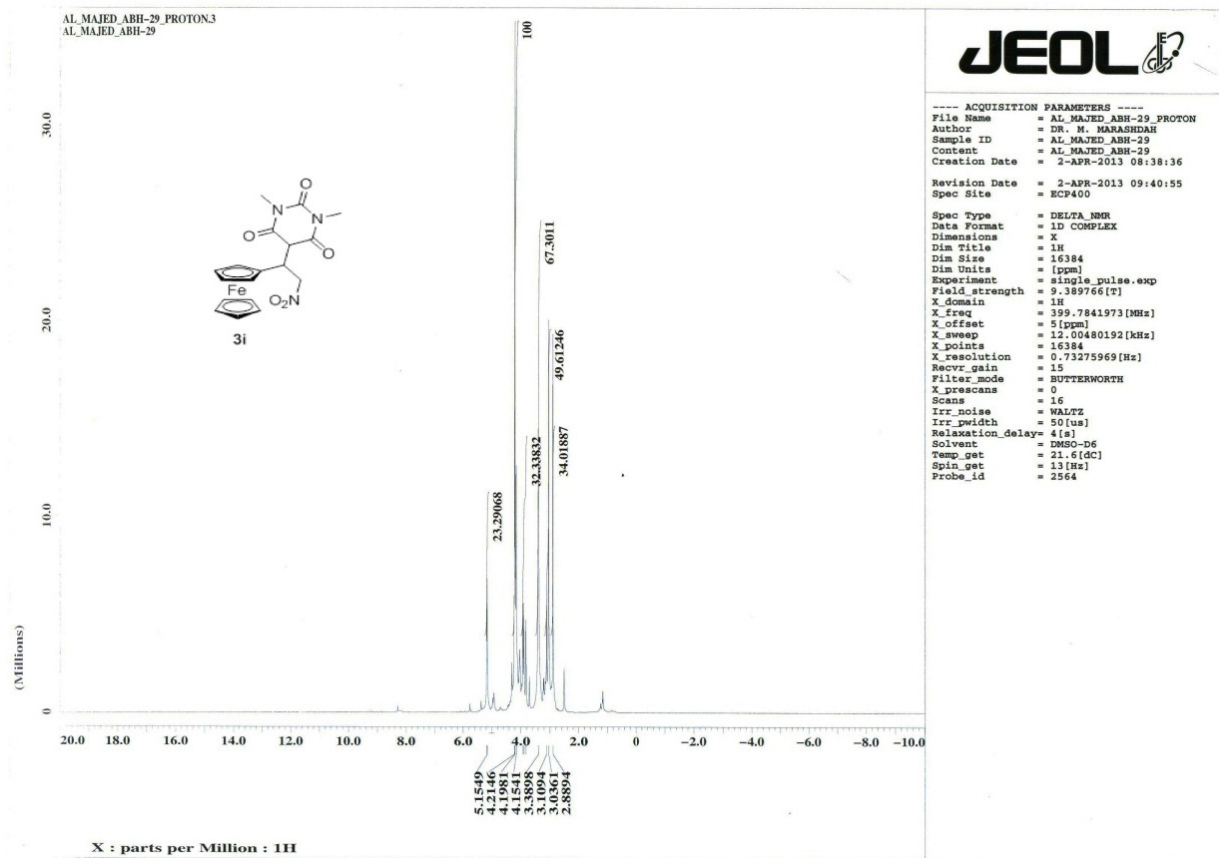

Figure S17.  $^{13}\text{C}$ -NMR (DMSO- $d_6$ ) of 3i.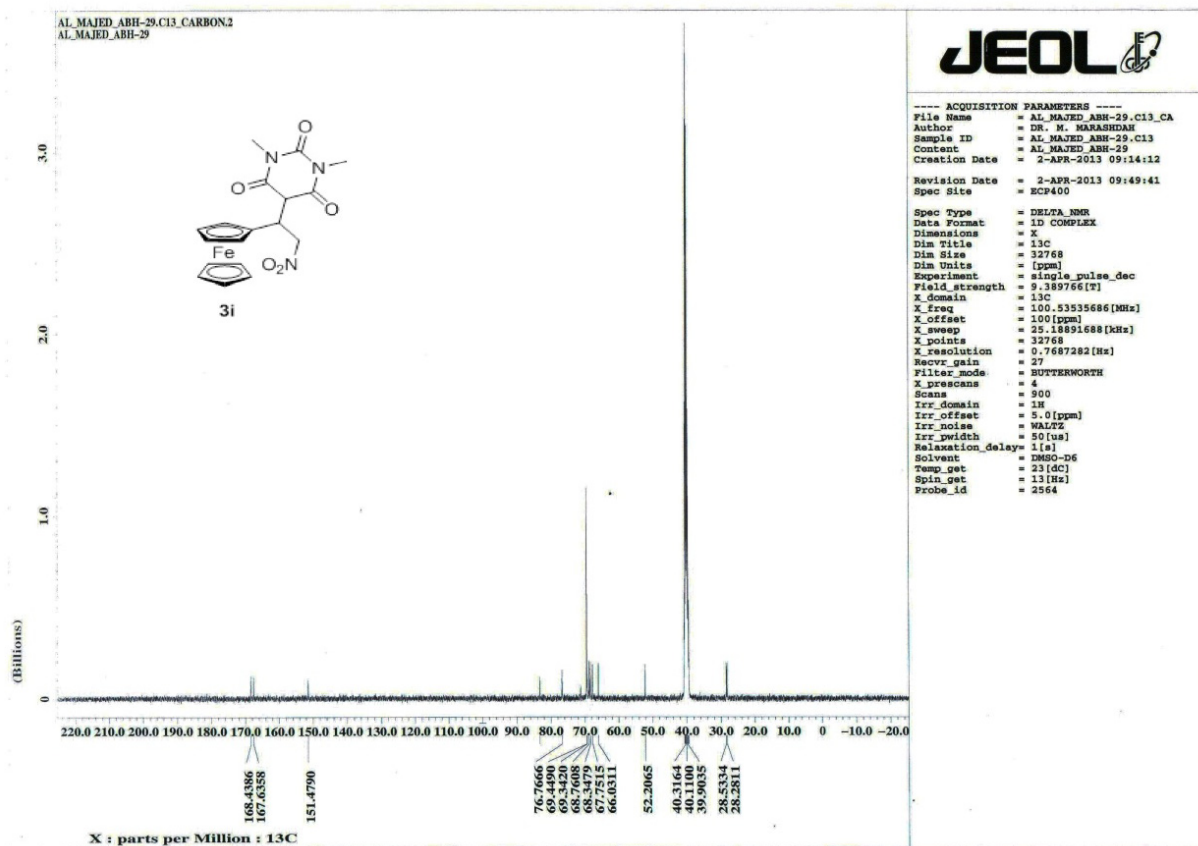

Figure S18. <sup>1</sup>H-NMR (DMSO-d<sub>6</sub>) of 3m.

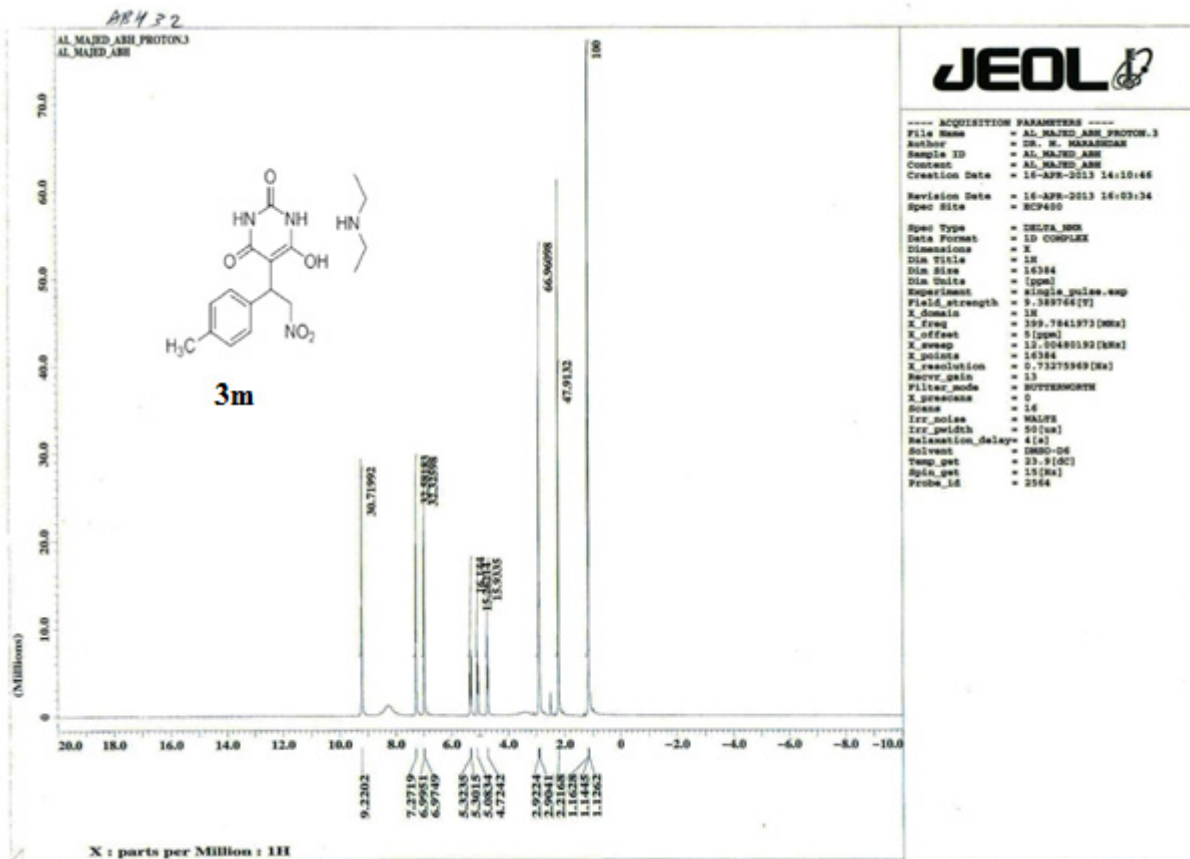

Figure S19.  $^{13}\text{C}$ -NMR (DMSO- $d_6$ ) of 3m.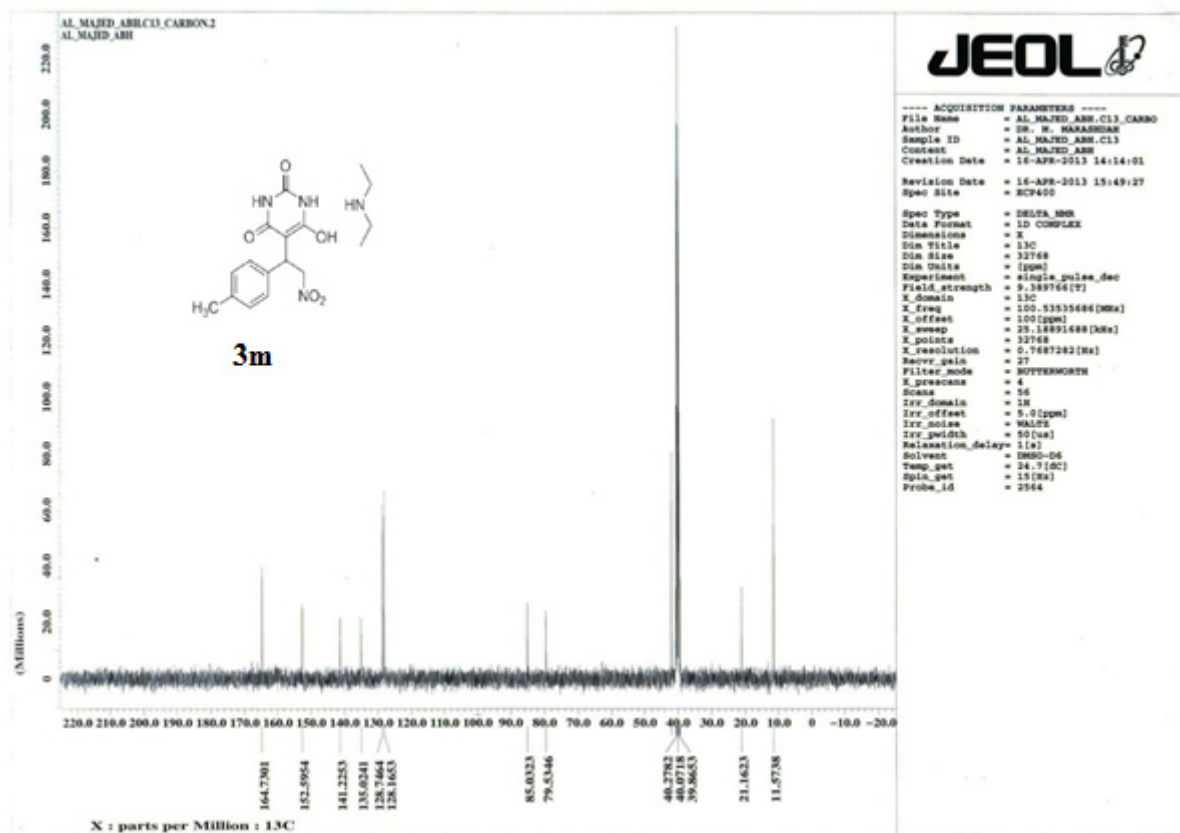

Figure S20.  $^1\text{H-NMR}$  ( $\text{DMSO-}d_6$ ) of 3p.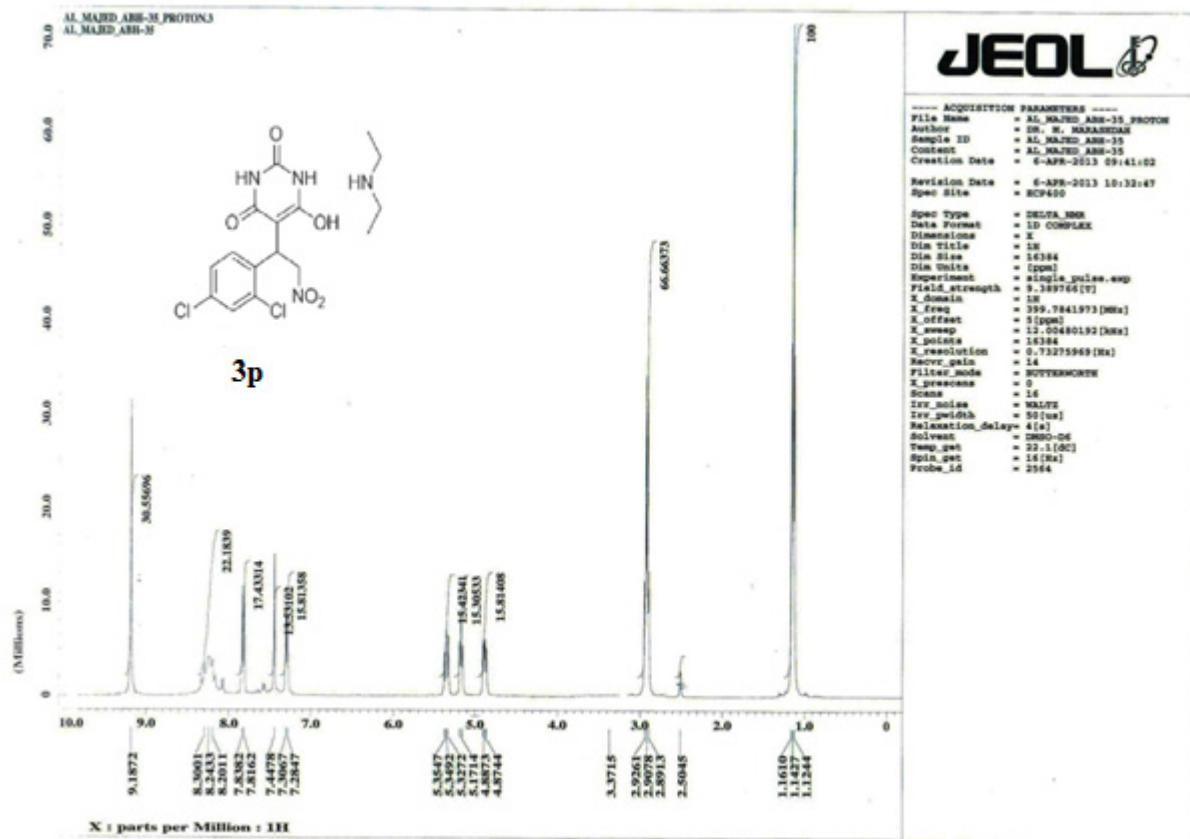

Figure S21.  $^{13}\text{C}$ -NMR (DMSO- $d_6$ ) of 3p.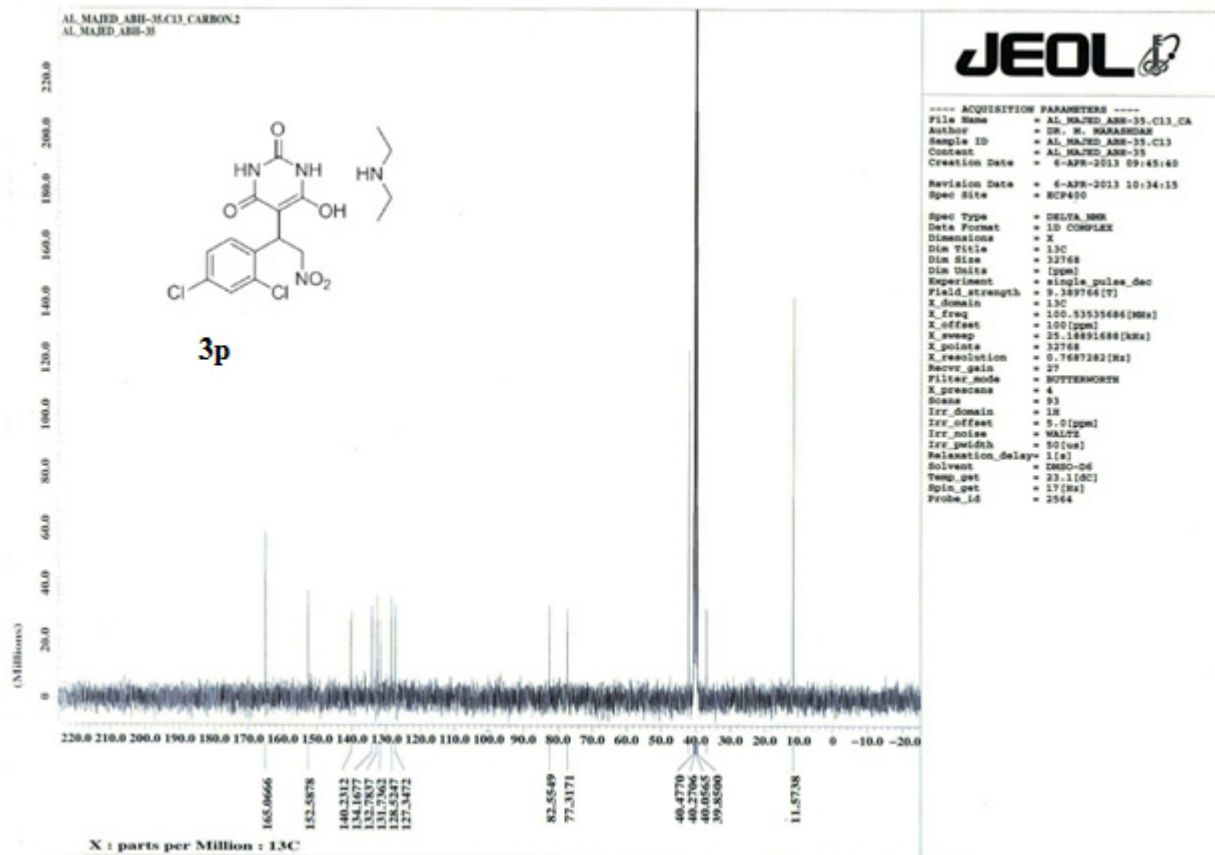

Figure S22.  $^1\text{H-NMR}$  (DMSO- $d_6$ ) of 3r.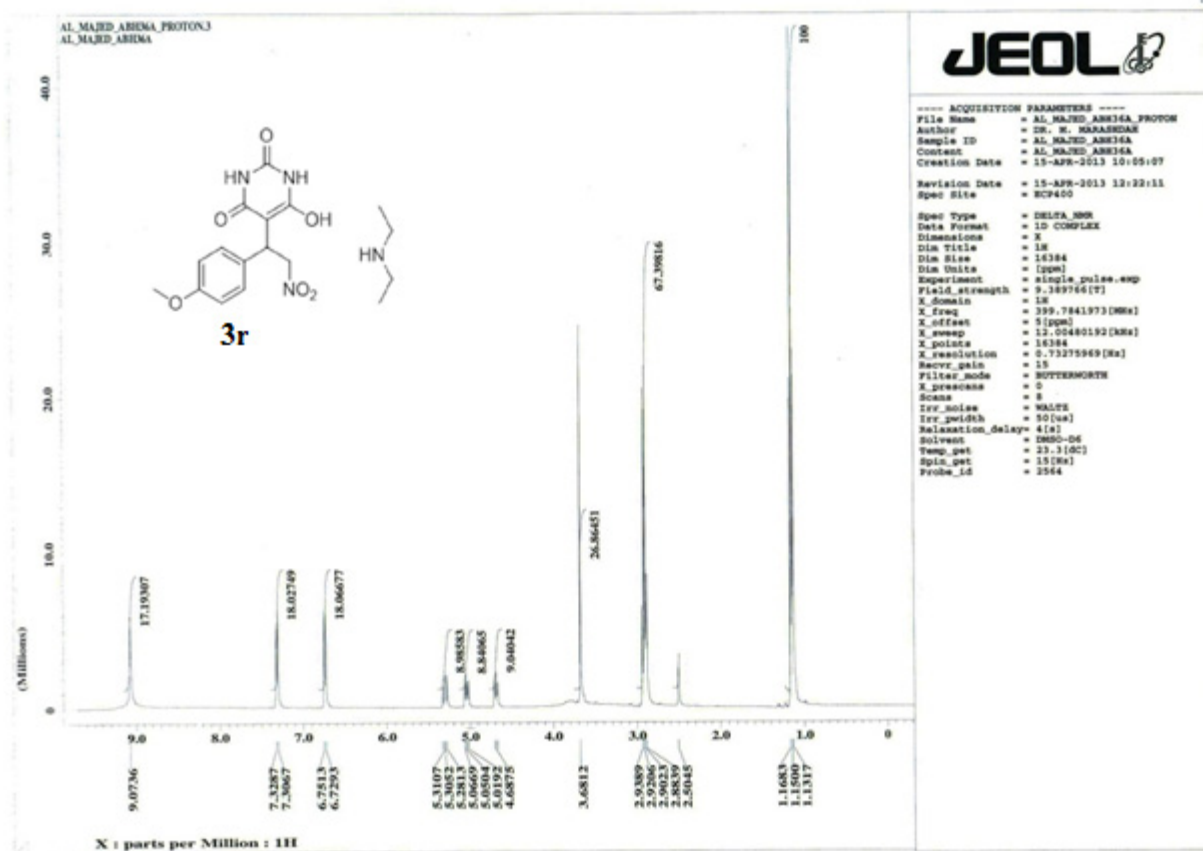

Figure S23.  $^{13}\text{C}$ -NMR (DMSO- $d_6$ ) of 3r.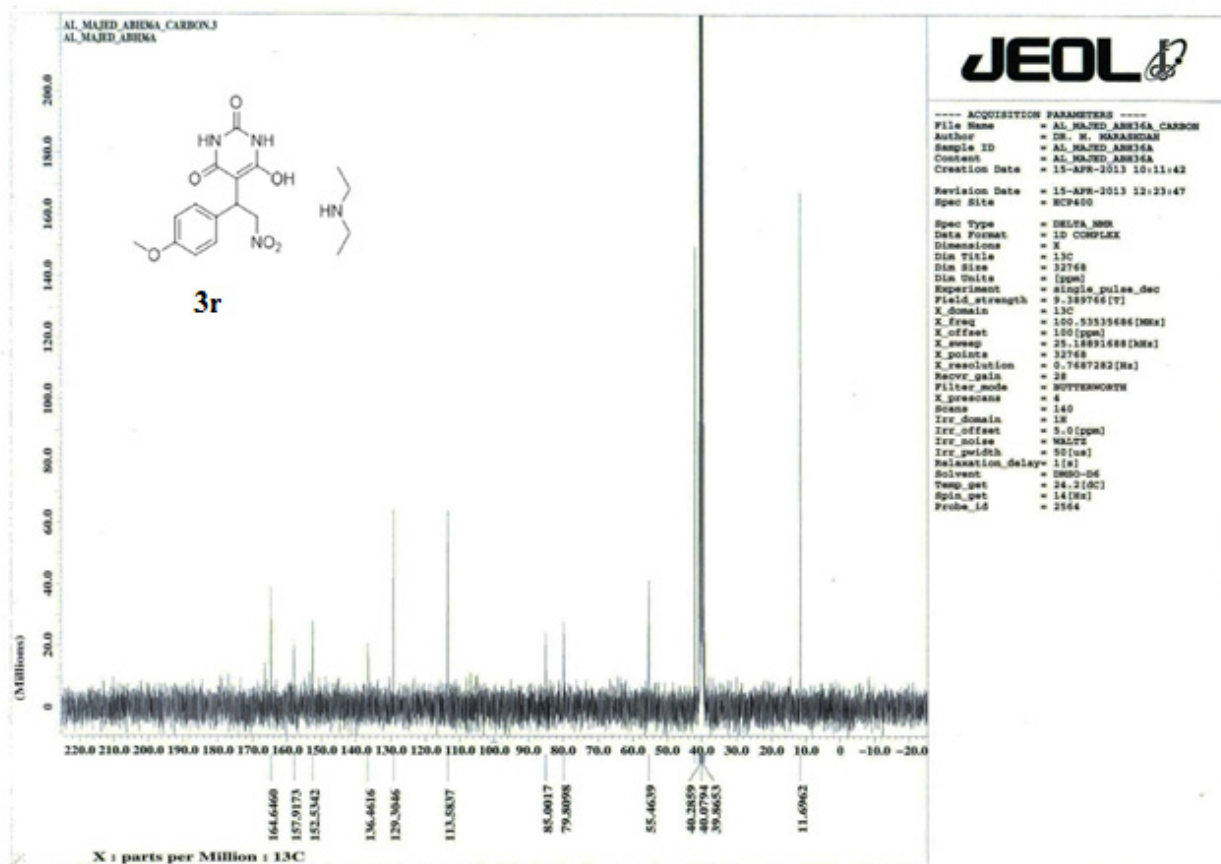



Figure S24.  $^1\text{H-NMR}$  (DMSO- $d_6$ ) of 3s.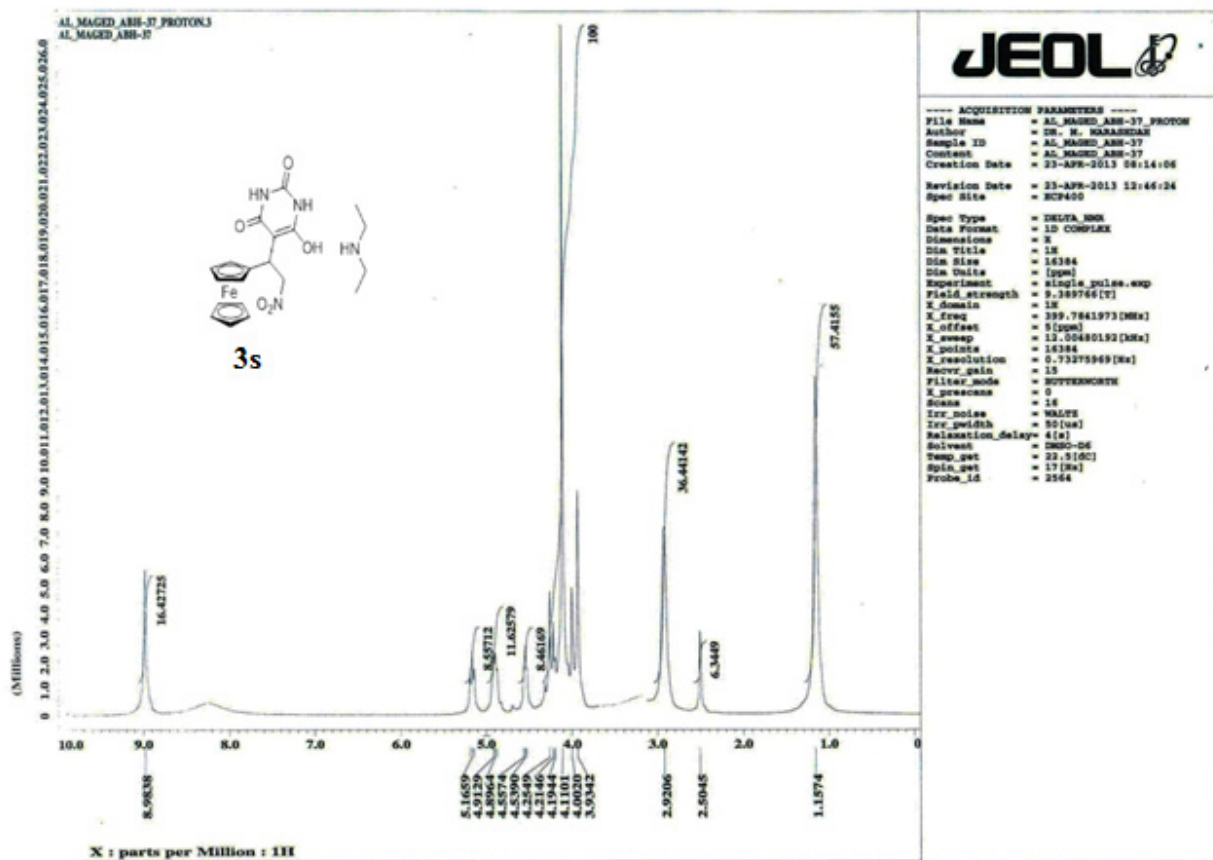

Figure S25.  $^{13}\text{C}$ -NMR (DMSO- $d_6$ ) of 3s.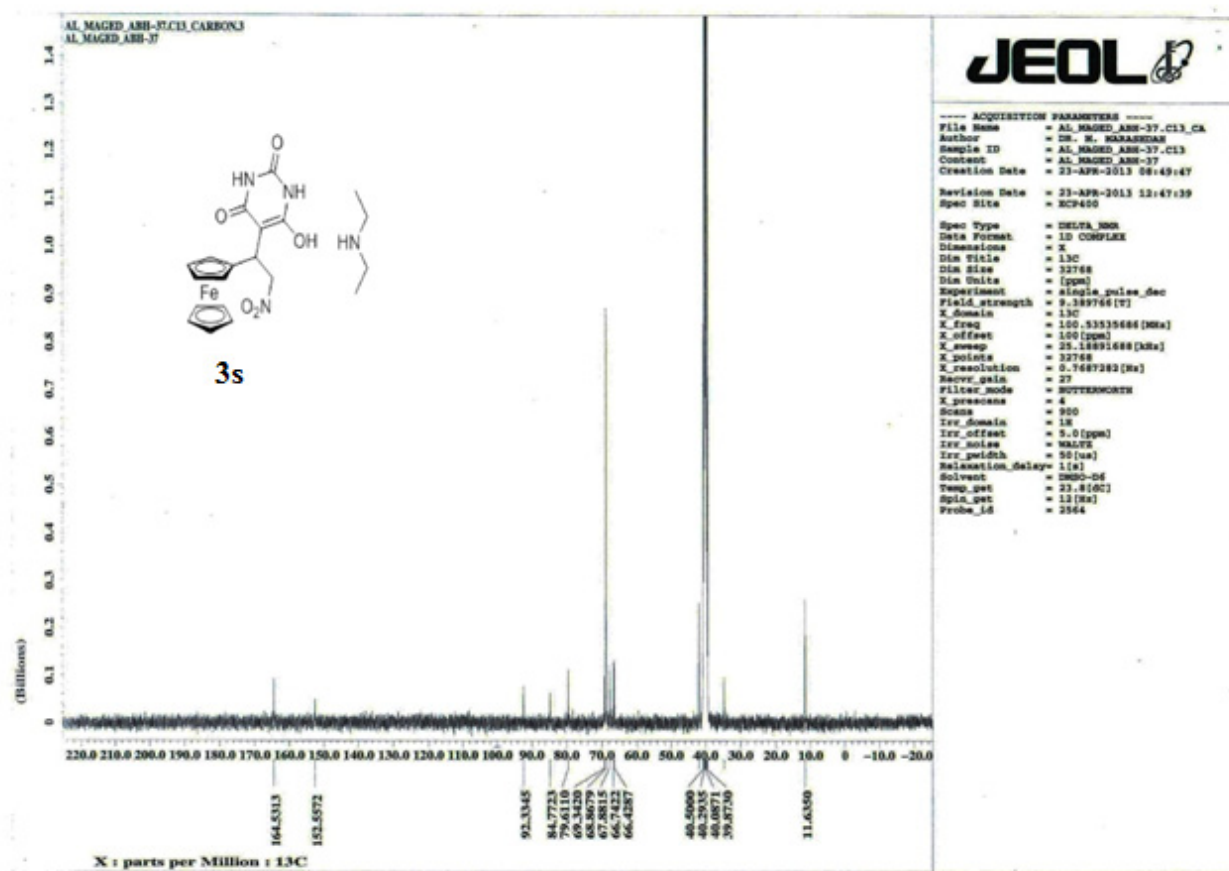

Figure S26.  $^1\text{H-NMR}$  (DMSO- $d_6$ ) of 3t.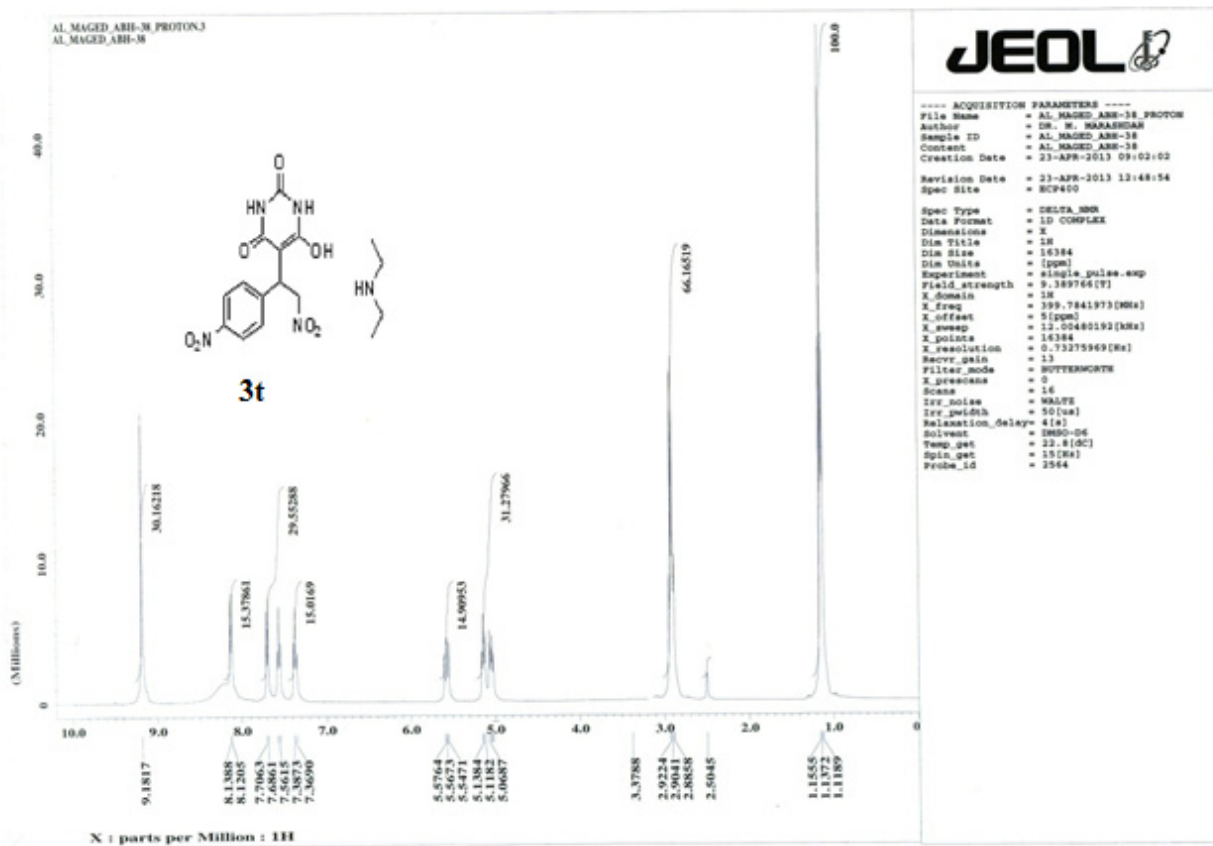

Figure S27.  $^{13}\text{C}$ -NMR (DMSO- $d_6$ ) of 3t.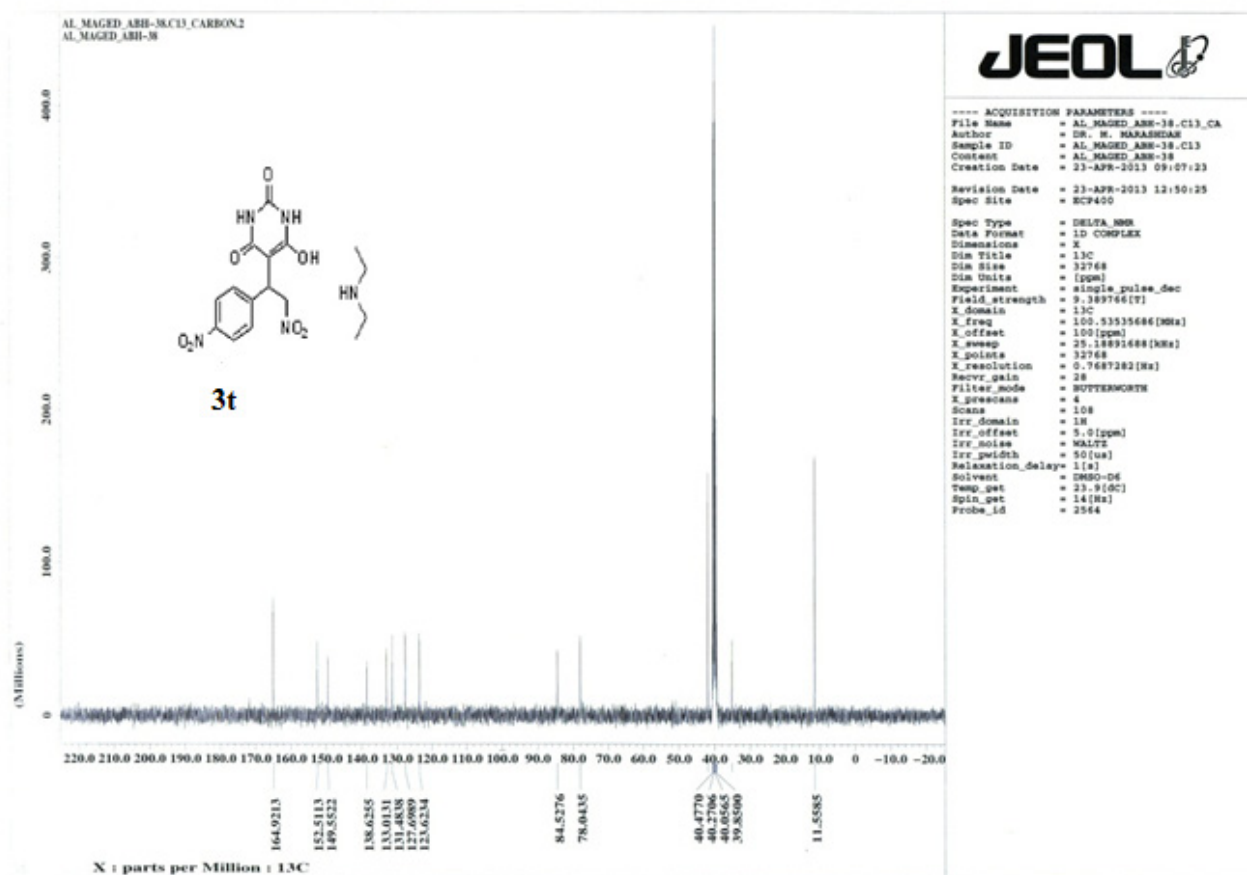

Supplement: molecules-19-01150-s001.pdf [file molecules-19-01150-s001.pdf]
